# Supplementary material
Source: PubMed Central journal article supplement (PMC3223311)
Supplement: ismej201177x1.pdf [file ismej201177x1.pdf]

## Supplementary Information

# Thermophilic anaerobic oxidation of methane by marine microbial consortia

Thomas Holler, Friedrich Widdel, Katrin Knittel, Rudolf Amann, Matthias Y Kellermann,  
Kai-Uwe Hinrichs, Andreas Teske, Antje Boetius, Gunter Wegener\*

Supplementary Information includes

Supplementary Figures 1 and 2

Supplementary Tables 1 and 2

References Supplementary Information

Correspondence: G. Wegener, Max Planck Institute for Marine Microbiology, Celsiusstraße 1, D-28359 Bremen, German; e-mail: gwegener@mpi-bremen.de

**Supplementary Table 1** *In vitro* studies of AOM and apparent temperature ranges (modified from Boetius *et al.*, 2009).

| <i>Sampling site</i>                          | <i>Dominating ANME<sup>a</sup> population</i> | <i>In situ temperature (°C)</i> | <i>In vitro temperature optimum of AOM (°C)</i> | <i>Reference</i>                                                                                                                |
|-----------------------------------------------|-----------------------------------------------|---------------------------------|-------------------------------------------------|---------------------------------------------------------------------------------------------------------------------------------|
| Haakon Mosby Mud Volcano (North Atlantic)     | ANME-3/DBB <sup>b</sup>                       | −1.5                            | 4–8                                             | Krüger <i>et al.</i> , 2005                                                                                                     |
| Hydrate Ridge (East Pacific)                  | ANME-2/DSS <sup>c</sup>                       | 4                               | 10–15                                           | Nauhaus <i>et al.</i> , 2005                                                                                                    |
| Monterey Basin (East Pacific)                 | ANME-2/DSS                                    | 4                               | 5                                               | Girguis <i>et al.</i> , 2003                                                                                                    |
| Gulf of Mexico                                | ANME-2/DSS                                    | 6                               | 16–20                                           | Krüger <i>et al.</i> , 2005                                                                                                     |
| Black Sea                                     | ANME-1/DSS<br>ANME-2/DSS                      | 8                               | 16–25                                           | Nauhaus <i>et al.</i> , 2005,<br>Deusner <i>et al.</i> , 2010                                                                   |
| Amon/Isis Mud Volcano (Eastern Mediterranean) | ANME-2/DSS                                    | 14                              | 20                                              | Holler <i>et al.</i> , 2009,<br>Schreiber <i>et al.</i> , 2010                                                                  |
| Eckernförde Bay (Baltic Sea)                  | ANME-2/DSS                                    | 5–20                            | 20                                              | Krüger <i>et al.</i> , 2005,<br>Treude <i>et al.</i> , 2005,<br>Jagersma <i>et al.</i> , 2009,<br>Meulepas <i>et al.</i> , 2009 |
| Kattegat (Baltic Sea)                         | ANME-2/DSS,<br>DBB                            | 5–20                            | 20–25                                           | Krüger <i>et al.</i> , 2005                                                                                                     |

<sup>a</sup> ANME, clusters of anaerobic methanotrophs (Euryarchaeota)

<sup>b</sup> DBB, *Desulfobulbus*

<sup>c</sup> DSS, *Desulfosarcina/Desulfococcus*

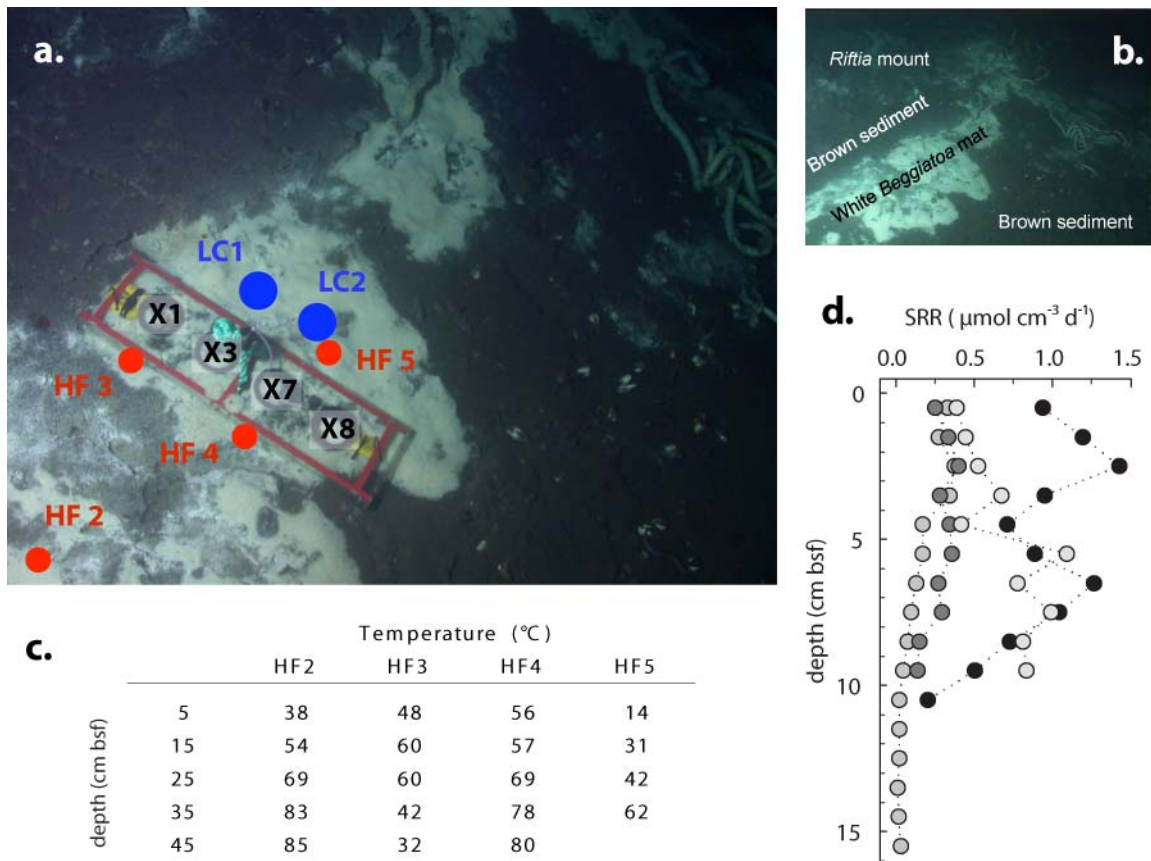

**Supplementary Figure 1** Images and data from sampling site. **(a)** Placement of long cores (LC1, 2), incubation cores (X1, X3, X7 and X8), and temperatures loggers (HF2, HF3, HF4, HF5) on *Beggiatoa*-covered sediment in Guaymas Basin (*ALVIN* Dive 4570). **(b)** Contextual information of the sampling site. **(c)** Temperature profiles from the sampling site. **(d)** Sulfate reduction rates derived from *in vivo* radiotracer incubations.

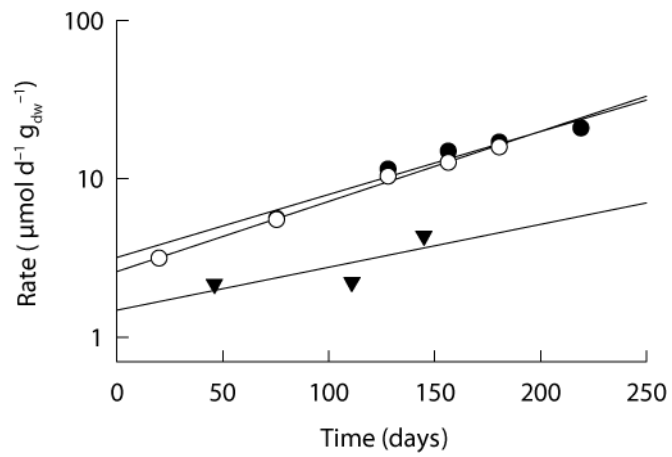

**Supplementary Figure 2** Semi-logarithmic plot of sulfide production in methane-amended sediment slurries incubated at 37 °C (open circle), 50 °C (filled circles) and 60 °C (triangles) yielding doubling times of 77, 68 and 112 days for the 37 °C, 50 °C and 60 °C enrichments, respectively.

**Supplementary Table 2** Oligonucleotide probes used for fluorescence *in situ* hybridization.

| <i>Probe</i>               | <i>Specificity</i>                                                        | <i>Probe sequence (5'-3')</i>                                    | <i>Target site<sup>a</sup></i> | <i>FA<sup>b</sup> [%]</i> | <i>Reference</i>             |
|----------------------------|---------------------------------------------------------------------------|------------------------------------------------------------------|--------------------------------|---------------------------|------------------------------|
| NON338                     | Background control                                                        | ACTCCTACGGGAGGCAGC                                               | 338–355                        | 10                        | Wallner <i>et al.</i> , 1993 |
| EUB338 I-III               | most <i>Bacteria</i>                                                      | { GCTGCCTCCCGTAGGAGT<br>GCAGCCACCCGTAGGTGT<br>GCTGCCACCCGTAGGTGT | 338–355                        | 35                        | Daims <i>et al.</i> , 1999   |
| Arch915                    | most <i>Archaea</i>                                                       | GTGCTCCCCCGCCAATTCCT                                             | 915–935                        | 35                        | Stahl & Amann 1991           |
| DSS658                     | <i>Desulfosarcina</i> spp./<br><i>Desulfococcus</i> spp.<br>and relatives | TCCAATTCCCTCTCCCAT                                               | 658–685                        | 50                        | Manz <i>et al.</i> , 1998    |
| ANME1-350                  | ANME-1 archaea                                                            | AGTTTTTCGCGCCTGATGC                                              | 350–367                        | 40                        | Boetius <i>et al.</i> , 2000 |
| ANME-1-GI812               | ANME-1 subgroup<br>Guaymas I                                              | CTGGCCACATCGTTTAC                                                | 812–829                        | 30                        | This study                   |
| cANME-1-GI812 <sup>c</sup> | competitor<br>oligonucleotide<br>targeting Guaymas I<br>cluster           | CTAGCCCGCATCGTTTAC                                               | 812–829                        | 30                        | This study                   |
| ANME-1-GII186              | ANME-1 subgroup<br>Guaymas II                                             | GGACATCCTGCATTCCAG                                               | 186–203                        | 10                        | This study                   |
| ANME-2-538                 | ANME-2 archaea                                                            | GGCTACCACTCGGGCCGC                                               | 538–555                        | 50                        | Treude <i>et al.</i> , 2005  |
| HotSeep-1-590              | HotSeep-1 cluster of<br>Deltaproteobacteria                               | ACACGCTCAACTTGCCTT                                               | 590–608                        | 20–25                     | This study                   |
| HotSeep-1-H5               | } helper probes for<br>HotSeep-1-590                                      | CCCGCCTRCGCGCCCTTT                                               | 572–589                        | 20–25                     | This study                   |
| HotSeep-1-H3               |                                                                           | ARGTTGAGCCTCAGGCTT                                               | 608–625                        |                           | This study                   |
| HotSeep-1-H3-3             |                                                                           | GTTTTGAGCGCCATTCTG                                               | 626–643                        |                           | This study                   |
| HotSeep-1-H3-3-3           |                                                                           | CGGGACTCAAGAAAGCA                                                | 644–661                        |                           | This study                   |

<sup>a</sup> Position in the 16S rRNA of *E.coli*<sup>b</sup> FA: formamide concentration (vol/vol) in the hybridization buffer<sup>c</sup> used as an unlabelled competitor oligonucleotide in hybridization with probe ANME-1-GI812 to limit cross-hybridizations with Guaymas II cluster

## References Supplementary Information

- Boetius A, Ravensschlag K, Schubert CJ, Rickert D, Widdel F, Gieseke A *et al* (2000). A marine microbial consortium apparently mediating anaerobic oxidation of methane. *Nature* **407**: 623–626.
- Boetius A, Holler T, Knittel K, Felden J, Wenzhöfer F (2009). The seabed as natural laboratory: lessons from uncultivated methanotrophs. In: Epstein SS (ed). *Microbiology Monographs: Uncultivated Microorganisms*. Springer: Berlin. pp 59–82.
- Daims H, Bruhl A, Amann R, Schleifer KH, Wagner M (1999). The domain-specific probe EUB338 is insufficient for the detection of all Bacteria: Development and evaluation of a more comprehensive probe set. *Syst Appl Microbiol* **22**: 434–444.
- Deusner C, Meyer V, Ferdelman TG (2010). High-pressure systems for gas-phase free continuous incubation of enriched marine microbial communities performing anaerobic oxidation of methane. *Biotechnol Bioeng* **105**: 524–533.
- Girguis PR, Orphan VJ, Hallam SJ, DeLong EF (2003). Growth and methane oxidation rates of anaerobic methanotrophic archaea in a continuous-flow bioreactor. *Appl Environ Microbiol* **69**: 5472–5482.
- Holler T, Wegener G, Knittel K, Boetius A, Brunner B, Kuypers MMM *et al* (2009). Substantial  $^{13}\text{C}/^{12}\text{C}$  and D/H fractionation during anaerobic oxidation of methane by marine consortia enriched *in vitro*. *Environ Microbiol Rep* **1**: 370–376.
- Jagersma GC, Meulepas RJW, Jong IH, Gieteling J, Klimiuk A, Schouten S *et al* (2009). Microbial diversity and community structure of a highly active anaerobic methane-oxidizing sulfate-reducing enrichment. *Environ Microbiol* **11**: 3223–3232.
- Krüger M, Treude T, Wolters H, Nauhaus K, Boetius A (2005). Microbial methane turnover in different marine habitats. *Palaeogeogr Paleoclimatol Paleoecol* **227**: 6–17.
- Manz W, Eisenbrecher M, Neu TR, Szewzyk U (1998). Abundance and spatial organization of Gram-negative sulfate-reducing bacteria in activated sludge investigated by *in situ* probing with specific 16S rRNA targeted oligonucleotides. *FEMS Microbiol Ecol* **25**: 43–61.
- Meulepas RJW, Jagersma CG, Khadem AF, Buisman CJN, Stams AJM, Lens PNL (2009). Effect of environmental conditions on sulfate reduction with methane as electron donor by an Eckernförde Bay enrichment. *Environ Sci Technol* **43**: 6553–6559.
- Nauhaus K, Treude T, Boetius A, Krüger M (2005). Environmental regulation of the anaerobic oxidation of methane: a comparison of ANME-I and ANME-II communities. *Environ Microbiol* **7**: 98–106.
- Schreiber L, Holler T, Knittel K, Meyerdierks A, Amann R (2010). Identification of the dominant sulfate-reducing bacterial partner of anaerobic methanotrophs of the ANME-2 clade. *Environ Microbiol* **12**: 2327–2340.
- Stahl DA, Amann R (1991). Development and application of nucleic acid probes. In: Stackebrandt E, Goodfellow M (eds). *Nucleic Acid Techniques in Bacterial Systematics*. John Wiley&Sons Ltd.: Chichester. pp 205–248.
- Treude T, Krüger M, Boetius A, Jørgensen BB (2005). Environmental control on anaerobic oxidation of methane in the gassy sediments of Eckernförde Bay (German Baltic). *Limnol Oceanogr* **50**: 1771–1786.
- Wallner G, Amann R, Beisker W (1993). Optimizing fluorescent *in situ* hybridization with rRNA-targeted oligonucleotide probes for flow cytometric identification of microorganism. *Cytometry* **14**: 136–143.
